# Supplementary material
Source: PubMed Central journal article supplement (PMC7209936)

# Major histocompatibility complex-associated odour preferences and human mate choice: near and far horizons

J. Havlíček\*, J. Winternitz✉\*, and S.C. Roberts

✉ Jamie C. Winternitz

Department of Animal Behaviour, Bielefeld University, Bielefeld 33615, Germany;

Email: [jcwinternitz@gmail.com](mailto:jcwinternitz@gmail.com)

\* These authors contributed equally to this work

## SUPPLEMENTARY MATERIAL

|                                                                                                            |           |
|------------------------------------------------------------------------------------------------------------|-----------|
| <b>SUPPLEMENTARY TEXT .....</b>                                                                            | <b>2</b>  |
| Data bibliography.....                                                                                     | 2         |
| Details of data extraction and effect size calculations for MHC mate choice studies .....                  | 4         |
| Details of data extraction and effect size averaging for neutral markers from MHC studies .....            | 11        |
| List of relevant papers excluded from the present study.....                                               | 13        |
| <b>SUPPLEMENTARY TABLES .....</b>                                                                          | <b>14</b> |
| Table S1. Estimated effect of human genomic MHC similarity on mating using moderators. ....                | 14        |
| Table S2. Estimated effect of human MHC similarity on relationship satisfaction using moderators. ....     | 16        |
| Table S3. Estimated effect of human MHC similarity on odour preferences using moderators. ....             | 17        |
| Table S4. Estimated effect of non-HC using human MHC similarity on odour preferences using moderators..... | 18        |
| Table S5. Estimated effect of human MHC similarity on mate selection using moderators. ....                | 19        |
| Table S6. Testing for publication bias using Egger's regression test of funnel plot asymmetry. ....        | 21        |
| <b>SUPPLEMENTARY FIGURES.....</b>                                                                          | <b>22</b> |
| Figure S1. Forest plots of standardized effect sizes by study for different datasets.....                  | 22        |
| Figure S2. Trim and fill contour-enhanced funnel plots for the different datasets.....                     | 24        |
| Figure S3. Meta-regression plot for all mate selection studies indicates evidence of publication bias..... | 26        |

## Supplementary Text

This includes the following sections: (1) Data bibliography, (2) Details of data extraction and effect size calculation for MHC mate choice studies, (3) Details of data extraction and effect size averaging for neutral markers from MHC studies, and (4) List of relevant papers excluded from the present study. All data used for analyses are provided in a CSV file on figshare (doi: 10.6084/m9.figshare.8869505).

### Data bibliography

- Chaix RI, Cao C, Donnelly P (2008) Is mate choice in humans MHC-dependent? *PLoS Genetics* **4**, e1000184.
- Cretu-Stancu M, Kloosterman WP, Pulit SL (2018) No evidence that mate choice in humans is dependent on the MHC. *bioRxiv*.
- Dandine-Roulland C, Laurent R, Dall'Ara I, Toupance B, Chaix R (2019) Genomic evidence for MHC disassortative mating in humans. *Proceedings of the Royal Society B* **286**, 20182664.
- Derti A, Cenik C, Kraft P, Roth FP (2010) Absence of evidence for MHC-dependent mate selection within HapMap populations. *PLoS Genetics* **6**, e1000925.
- Garver-Apgar CE, Gangestad SW, Thornhill R, Miller RD, Olp JJ (2006) Major histocompatibility complex alleles, sexual responsivity, and unfaithfulness in romantic couples. *Psychological Science* **17**, 830-835.
- Giphart M, D'Amato J (1983) HLA and reproduction? *Journal of immunogenetics* **10**, 25-29.
- Hedrick PW, Black FL (1997) HLA and mate selection: no evidence in South Amerindians. *American Journal of Human Genetics* **61**, 505-511.
- Ihara Y, Aoki K, Tokunaga K, Takahashi K, Juji T (2000) HLA and human mate choice: tests on Japanese couples. *Anthropological Science* **108**, 199-214.
- Israeli M, Kristt D, Nardi Y, Klein T (2014) Genetic considerations in human sex-mate selection: partners share Human Leukocyte Antigen but not Short-Tandem-Repeat identity markers. *American Journal of Reproductive Immunology* **71**, 467-471.
- Jacob S, McClintock MK, Zelano B, Ober C (2002) Paternally inherited HLA alleles are associated with women's choice of male odor. *Nature genetics* **30**, 175-179.
- Jin K, Speed T, Thomson G (1995) Tests of random mating for a highly polymorphic locus: application to HLA data. *Biometrics*, 1064-1076.
- Khankhanian P, Gourraud PA, Caillier SJ, Santaniello A, Hauser SL, Baranzini SE, Oksenberg JR (2010) Genetic variation in the odorant receptors family 13 and the mhc loci influence mate selection in a multiple sclerosis dataset. *BMC Genomics* **11**, 626.
- Kromer J, Hummel T, Pietrowski D, Giani A, Sauter J, Ehninger G, Schmidt A, Croy I (2016) Influence of HLA on human partnership and sexual satisfaction. *Scientific Reports* **6**, 32550.
- Laurent R, Toupance B, Chaix R (2012) Non-random mate choice in humans: insights from a genome scan. *Molecular Ecology* **21**, 587-596.
- Nordlander C, Hammarström L, Lindblom B, Smith CE (1983) No role of HLA in mate selection. *Immunogenetics* **18**, 429-431.
- Ober C, Weitkamp LR, Cox N, Dytch H, Kostyu D, Elias S (1997) HLA and mate choice in humans. *American Journal of Human Genetics* **61**, 497-504.
- Pollack MS, Wysocki CJ, Beauchamp GK, Braun Jr D, Callaway C, Dupont B (1982) Absence of HLA association or linkage for variations in sensitivity to the odor of androstenone. *Immunogenetics* **15**, 579-589.

- Probst F, Fischbacher U, Lobmaier JS, Wirthmüller U, Knoch D (2017) Men's preferences for women's body odours are not associated with human leucocyte antigen. *Proceedings of the Royal Society B: Biological Sciences* **284**, 20171830.
- Qiao Z, Powell JE, Evans DM (2018) MHC-Dependent Mate Selection within 872 Spousal Pairs of European Ancestry from the Health and Retirement Study. *Genes* **9**, 53.
- Roberts SC, Gosling LM, Carter V, Petrie M (2008) MHC-correlated odour preferences in humans and the use of oral contraceptives. *Proceedings of the Royal Society B: Biological Sciences* **275**, 2715-2722.
- Rosenberg LT, Cooperman D, Payn R (1983) HLA and mate selection. *Immunogenetics* **17**, 89-93.
- Sans M, Alvarez I, Callegari-Jacques S, Salzano F (1994) Genetic similarity and mate selection in Uruguay. *Journal of biosocial science* **26**, 285-289.
- Santos PSC, Schinemann JA, Gabardo J, da Graça Bicalho M (2005) New evidence that the MHC influences odor perception in humans: a study with 58 Southern Brazilian students. *Hormones and Behavior* **47**, 384-388.
- Saphire-Bernstein S, Larson CM, Gildersleeve KA, Fales MR, Pillsworth EG, Haselton MG (2017) Genetic compatibility in long-term intimate relationships: partner similarity at major histocompatibility complex (MHC) genes may reduce in-pair attraction. *Evolution and Human Behavior* **38**, 190-196.
- Sorokowska A, Pietrowski D, Schäfer L, Kromer J, Schmidt AH, Sauter J, Hummel T, Croy I (2018) Human Leukocyte Antigen similarity decreases partners' and strangers' body odor attractiveness for women not using hormonal contraception. *Hormones and Behavior* **106**, 144-149.
- Thornhill R, Gangestad SW, Miller R, Scheyd G, McCollough JK, Franklin M (2003) Major histocompatibility complex genes, symmetry, and body scent attractiveness in men and women. *Behavioral Ecology* **14**, 668-678.
- Wedekind C, Furi S (1997) Body odour preferences in men and women: do they aim for specific MHC combinations or simply heterozygosity? *Proceedings of the Royal Society of London B: Biological Sciences* **264**, 1471-1479.
- Wedekind C, Seebeck T, Bettens F, Paepke AJ (1995) MHC-dependent mate preferences in humans. *Proceedings of the Royal Society of London B: Biological Sciences* **260**, 245-249.
- Wu K, Chen C, Moyzis RK, Nuno M, Yu Z, Greenberger E (2018) More than skin deep: Major histocompatibility complex (MHC)-based attraction among Asian American speed-daters. *Evolution and Human Behavior* **39**, 447-456.
- Zaidi AA, White JD, Mattern BC, Liebowitz CR, Puts DA, Claes P, Shriver MD (2019) Facial masculinity does not appear to be a condition-dependent male ornament and does not reflect MHC heterozygosity in humans. *Proceedings of the National Academy of Sciences* **116**, 1633-1638.

## Details of data extraction and effect size calculations for MHC mate choice studies

(-) indicates preference/choice for dissimilarity in the original study and (+) indicates preference/choice for similarity in the original study. Final effect sizes were calculated to reflect the direction of original preference (- for dissimilarity, + for similarity).

| Publication                  | Original test statistic | Conversion method used                                     | corr   | N target | N rater | Details                                                                                                                                                                          |
|------------------------------|-------------------------|------------------------------------------------------------|--------|----------|---------|----------------------------------------------------------------------------------------------------------------------------------------------------------------------------------|
| Chaix et al. 2008            | p=0.015 (-)             | Calculated from pes(), program compute.es; 2-sided p-value | -0.318 | 28       | 28      | Calculated r from p-value. European pairs, SNP data.                                                                                                                             |
| Chaix et al. 2008            | p=0.23 (+)              | Calculated from pes(), program compute.es; 2-sided p-value | 0.163  | 27       | 27      | Calculated r from p-value. Yoruban pairs, SNP data.                                                                                                                              |
| Chaix et al. 2008            | p=0.084 (-)             | Calculated from pes(), program compute.es; 2-sided p-value | -0.229 | 28       | 28      | Calculated r from p-value for 6 HLA classical loci. European pairs.                                                                                                              |
| Chaix et al. 2008            | p=0.412 (+)             | Calculated from pes(), program compute.es; 2-sided p-value | 0.112  | 27       | 27      | Calculated r from p-value for 6 HLA classical loci. Yoruban pairs.                                                                                                               |
| Cretu-Stancu et al. 2018     | p=0.702 (+)             | calculated from pes(), program compute.es; 1-sided p-value | 0.024  | 239      | 239     | Calculated r from p-value. MHC region size = 3.6 Mb. Netherland pairs.                                                                                                           |
| Cretu-Stancu et al. 2018     | p=0.696 (+)             | calculated from pes(), program compute.es; 1-sided p-value | 0.023  | 239      | 239     | Calculated r from p-value. MHC region size = 6.7 Mb. Netherland pairs.                                                                                                           |
| Cretu-Stancu et al. 2018     | p=0.740 (+)             | Calculated from pes(), program compute.es; 1-sided p-value | 0.029  | 239      | 239     | Table 1 (only using classical HLA markers), calculated r from p-value. Netherland pairs.                                                                                         |
| Dandine-Roulland et al. 2019 | p=0.343, p=.308 (-)     | Calculated from pes(), program compute.es; 2-sided p-value | -0.116 | 36       | 36      | Calculated r from p-value(b) from Table 1 (between spouses and non-spouses) and Table 2 (between spouses and opposite-sex non-spouses) and then took the mean. Belgium pairs.    |
| Dandine-Roulland et al. 2019 | p=0.068, p=0.055 (-)    | Calculated from pes(), program compute.es; 2-sided p-value | -0.143 | 86       | 86      | Calculated r from p-value(b) from Table 1 (between spouses and non-spouses) and Table 2 (between spouses and opposite-sex non-spouses) and then took the mean. Ireland pairs.    |
| Dandine-Roulland et al. 2019 | p=0.170, p=0.248 (-)    | Calculated from pes(), program compute.es; 2-sided p-value | -0.086 | 108      | 108     | Calculated r from p-value(b) from Table 1 (between spouses and non-spouses) and Table 2 (between spouses and opposite-sex non-spouses) and then took the mean. Germany pairs.    |
| Dandine-Roulland et al. 2019 | p=0.040, p=0.057 (-)    | Calculated from pes(), program compute.es; 2-sided p-value | -0.080 | 302      | 302     | Calculated r from p-value(b) from Table 1 (between spouses and non-spouses) and Table 2 (between spouses and opposite-sex non-spouses) and then took the mean. Netherland pairs. |

|                              |                                                                                                                    |                                                                                      |        |     |     |                                                                                                                                                                                                                                                                            |
|------------------------------|--------------------------------------------------------------------------------------------------------------------|--------------------------------------------------------------------------------------|--------|-----|-----|----------------------------------------------------------------------------------------------------------------------------------------------------------------------------------------------------------------------------------------------------------------------------|
| Dandine-Roulland et al. 2019 | p=0.157, p=0.124 (-)                                                                                               | Calculated from pes(), program compute.es; 2-sided p-value                           | -0.093 | 126 | 126 | Calculated r from p-value(b) from Table 1 (between spouses and non-spouses) and Table 2 (between spouses and opposite-sex non-spouses) and then took the mean. UK pairs.                                                                                                   |
| Dandine-Roulland et al. 2019 | p=0.179, p=0.157 (-)                                                                                               | Calculated from pes(), program compute.es; 2-sided p-value                           | -0.117 | 69  | 69  | Calculated r from p-value(b) from Table 1 (between spouses and non-spouses) and Table 2 (between spouses and opposite-sex non-spouses) and then took the mean. Spain pairs.                                                                                                |
| Dandine-Roulland et al. 2019 | p=0.575, p=0.727 (+)                                                                                               | Calculated from pes(), program compute.es; 2-sided p-value                           | 0.026  | 156 | 156 | Calculated r from p-value(b) from Table 1 (between spouses and non-spouses) and Table 2 (between spouses and opposite-sex non-spouses) and then took the mean. Israel pairs.                                                                                               |
| Derti et al. 2010            | p=0.351 (-)                                                                                                        | Calculated from pes(), program compute.es; 1-sided p-value                           | -0.055 | 24  | 24  | Calculated r from p-value. European pairs.                                                                                                                                                                                                                                 |
| Garver-Apgar et al. 2006     | t=1.26, n=48                                                                                                       | $r = t/\sqrt{t^2 + df}$                                                              | -0.183 | 48  | 48  | Calculated r from t-value. t(df) taken from p. 833. No HC USA pairs.                                                                                                                                                                                                       |
| Garver-Apgar et al. 2006     | r(37)=-0.12, r(42)=-0.13                                                                                           | NA                                                                                   | -0.125 | 48  | 48  | Correlation between MHC similarity and male sexual responsiveness and satisfaction. Calculated the weighted mean of: male's sexual responsivity to partner and satisfaction with sexual responsiveness of partner. N-target and N-rater taken from p. 833. Male USA rater. |
| Garver-Apgar et al. 2006     | r(41)=-0.35, r(43)=-0.30                                                                                           | NA                                                                                   | -0.324 | 48  | 48  | Correlation between MHC similarity and female sexual responsiveness. Calculated the weighted mean of: female's sexual responsivity to partner and satisfaction with sexual responsiveness of partner. N-target and N-rater taken from p. 832. Female no HC USA rater.      |
| Hedrick and Black 1997       | HLA-A Chi-square=0.803; B Chi-square=0.60; n=194                                                                   | weighted mean of r ( $(.0647+.0556)/2$ ) calculated from chies(), program compute.es | 0.06   | 194 | 194 | For each locus, Chi-square values were calculated comparing sharing 0 to 1+2 alleles, r was computed from Chi-square values, and we took the mean of r as the effect size. No HC South Amerindian pairs.                                                                   |
| Ihara et al. 2000            | Tohoku Chi-square=0.9705; 8JW Chi-square=0.4495, n=138,131; weighted mean of r ( $(138*.0839+131*.0586)/138+131$ ) | calculated from chies(), program compute.es                                          | 0.0716 | 269 | 269 | Chi-square values were calculated comparing sharing 0 to 1+2 alleles, and the weighted mean r was used to calculate the mean effect size. Japan pairs.                                                                                                                     |
| Israeli et al. 2014          | Chi-square=46.337                                                                                                  | calculated from chies(), program compute.es                                          | 0.3879 | 308 | 308 | Chi-square values were calculated comparing sharing 0 to 1+2 alleles. Data from Table 1 did not provide number of pairs with 0 antigens shared, but that was inferred from the sample sizes given for 1 and 2 matches and the total sample size. Israel pairs.             |

|                     |                                                                                        |                                             |        |      |      |                                                                                                                                                                                                                                                                                                                                                                                                                                                                              |
|---------------------|----------------------------------------------------------------------------------------|---------------------------------------------|--------|------|------|------------------------------------------------------------------------------------------------------------------------------------------------------------------------------------------------------------------------------------------------------------------------------------------------------------------------------------------------------------------------------------------------------------------------------------------------------------------------------|
| Israeli et al. 2014 | Chi-square=228.472, 51.477; weighted mean of $r((.4775+.2267)/2)$                      | calculated from chies(), program compute.es | 0.3521 | 1002 | 1002 | Chi-square values were calculated comparing sharing 0 to 1+2 alleles. We calculated the weighted mean effect size for Class I and Class II loci. Israel pairs.                                                                                                                                                                                                                                                                                                               |
| Jacob et al. 2002   | paternal t=4.0, df=21; maternal t=-1.34, df=17                                         | $(r=t/\sqrt{t^2+df})$                       | 0.2226 | 6    | 22   | Calculated r from t-values from paternally and maternally inherited allele effect sizes. Similarity at paternally inherited alleles was correlated with preference. No HC, Germany females.                                                                                                                                                                                                                                                                                  |
| Jin et al. 1995     | weighted mean of A, B and DR loci p of Chi-squares: p=0.17, 0.48, 0.28 (n=542,521,466) | calculated from pes(), program compute.es   | 0.0467 | 510  | 510  | We calculated r from p-values and then calculated the weighted mean effect size for A, B, and DR loci using results from corrected allele table test (recommended by authors for larger datasets). Sample size 510 (mean of 542,521,466). European pairs.                                                                                                                                                                                                                    |
| Kromer et al. 2016  | r=-0.126                                                                               | Calculated using mes() from compute.es.     | -0.126 | 248  | 248  | Sexual satisfaction raw mean scores from Table S1 were converted to r effect sizes. Then took the mean of Class I loci. Pref for dissimilarity = (-) effect size. This study did not report methods to control for population stratification in the sample, but as they used the most common allele frequencies in German populations for data imputation, I assume the population is of German ancestry. The N of target and rater were taken from Table S1. Female raters. |
| Kromer et al. 2016  | r=-0.024                                                                               | Calculated using mes() from compute.es.     | -0.024 | 248  | 248  | Sexual satisfaction raw mean scores from Table S1 were converted to r effect sizes. Then took the mean of Class I loci. Pref for dissimilarity = (-) effect size. This study did not report methods to control for population stratification in the sample, but as they used the most common allele frequencies in German populations for data imputation, I assume the population is of German ancestry. Male raters.                                                       |
| Kromer et al. 2016  | r=0.026                                                                                | Calculated using mes() from compute.es.     | 0.026  | 248  | 248  | Sexual satisfaction raw mean scores from Table S1 were converted to r effect sizes. Then took the mean of Class II loci. Pref for dissimilarity = (-) effect size. This study did not report methods to control for population stratification in the sample, but as they used the most common allele frequencies in German populations for data imputation, I assume the population is of German ancestry. Female raters.                                                    |

|                    |                        |                                         |        |     |     |                                                                                                                                                                                                                                                                                                                                                                                                                         |
|--------------------|------------------------|-----------------------------------------|--------|-----|-----|-------------------------------------------------------------------------------------------------------------------------------------------------------------------------------------------------------------------------------------------------------------------------------------------------------------------------------------------------------------------------------------------------------------------------|
| Kromer et al. 2016 | r=0.014                | Calculated using mes() from compute.es. | 0.014  | 248 | 248 | Sexual satisfaction raw mean scores from Table S1 were converted to r effect sizes. Then took the mean of Class II loci. Pref for dissimilarity = (-) effect size. This study did not report methods to control for population stratification in the sample, but as they used the most common allele frequencies in German populations for data imputation, I assume the population is of German ancestry. Male raters. |
| Kromer et al. 2016 | r=-0.050,-0.145,-0.139 | Calculated using mes() from compute.es. | -0.111 | 248 | 248 | Average effect size across loci from raw mean scores, from Table S1. Pref for dissimilarity = (-) effect size. This study did not report methods to control for population stratification in the sample, but as they used the most common allele frequencies in German populations for data imputation, I assume the population is of German ancestry. Odour preference for MHC class I female raters.                  |
| Kromer et al. 2016 | r=-0.014,-0.095,-0.072 | Calculated using mes() from compute.es. | -0.06  | 248 | 248 | Average effect size across loci from raw mean scores, from Table S1. Pref for dissimilarity = (-) effect size. This study did not report methods to control for population stratification in the sample, but as they used the most common allele frequencies in German populations for data imputation, I assume the population is of German ancestry. Odour preference for MHC class I male raters.                    |
| Kromer et al. 2016 | r=0.019,0.007,0.011    | Calculated using mes() from compute.es. | 0.0123 | 248 | 248 | Average effect size across loci from raw mean scores, from Table S1. Pref for dissimilarity = (-) effect size. This study did not report methods to control for population stratification in the sample, but as they used the most common allele frequencies in German populations for data imputation, I assume the population is of German ancestry. Odour preference for MHC class II female raters.                 |
| Kromer et al. 2016 | r=0.022,0.051,-0.007   | Calculated using mes() from compute.es. | 0.022  | 248 | 248 | Average effect size across loci from raw mean scores, from Table S1. Pref for dissimilarity = (-) effect size. This study did not report methods to control for population stratification in the sample, but as they used the most common allele frequencies in German populations for data imputation, I assume the population is of German ancestry. Odour preference for MHC class II male raters.                   |

|                        |                                                                                                                    |                                                                               |        |      |      |                                                                                                                                                                                                                                                                           |
|------------------------|--------------------------------------------------------------------------------------------------------------------|-------------------------------------------------------------------------------|--------|------|------|---------------------------------------------------------------------------------------------------------------------------------------------------------------------------------------------------------------------------------------------------------------------------|
| Nordlander et al. 1983 | Chi-square for A and B loci=1.64, 0.39, n=826; weighted mean of $r((.0446+.0217)/2)$                               | calculated from chies(), program compute.es                                   | 0.0132 | 826  | 826  | Calculated the weighted mean across A and B loci after converting Chi-square values to r. Sweden pairs.                                                                                                                                                                   |
| Ober et al. 1997       | Chi-square=7.90, n=411                                                                                             | calculated from chies(), program compute.es                                   | -0.139 | 411  | 411  | Calculated r from Chi-square using the program compute.es. European pairs.                                                                                                                                                                                                |
| Pollack et al. 1982    | Chi-square: 0.0002, 0.0112, 0.0474, 1.0276; n: 47.4,32.7,8.2,38.2; weighted mean of r=0.0021, 0.0185, 0.076, 0.164 | calculated from chies(), program compute.es                                   | 0.06   | 61   | 61   | We took the sum of the shared allele frequencies at each antigen for each locus (A,B,C,DR) and calculated Chi-square (df1) values for obs vs exp sharing frequencies. From Chi-squared values we computed r values and then calculated the weighted mean of r. USA pairs. |
| Probst et al. 2017     | t=-0.23, df=93                                                                                                     | r = $t/\sqrt{(tsquared+df)}$ ; paired t-test                                  | 0.0238 | 42   | 94   | Calculated r from t-value. Odour preferences of European males.                                                                                                                                                                                                           |
| Qiao et al. 2018       | p=0.829, p=0.218 (-)                                                                                               | Calculated from pes(), program compute.es; 2-sided p-value                    | -0.017 | 872  | 872  | Table 1. mean effect size of SNPs, from mean and median p-values. European pairs.                                                                                                                                                                                         |
| Qiao et al. 2018       | p=0.258, p=0.500, p=0.211, p=0.419, p=0.040, p=0.235 (-)                                                           | Calculated from pes(), program compute.es; 2-sided p-value                    | -0.028 | 872  | 872  | Table 1. Calculated effect sizes of HLA gene and amino acid p-values, from mean and median p-values. Then took the mean effect size. European pairs.                                                                                                                      |
| Roberts et al. 2008    | similar mean (sd) = 3.68(0.949); dissimilar mean = 3.80(0.885), n=40                                               | <a href="http://www.lyonsmorris.com/ma1/">http://www.lyonsmorris.com/ma1/</a> | -0.065 | 79   | 40   | From Table S3, for HC-using women including all shirts, we used the "desirability" measure, as this was more directly related to mate preferences than "intensity" or "pleasantness". We converted means and their standard deviations to r. UK female raters.            |
| Roberts et al. 2008    | similar mean (sd)=3.47(1.049); dissimilar mean=3.42(1.154), n=110                                                  | <a href="http://www.lyonsmorris.com/ma1/">http://www.lyonsmorris.com/ma1/</a> | 0.0226 | 110  | 110  | From Table 1, we used the mean of all women for all shirts (non-HC users) for desirability (we didn't include data from session 2 non-HC users because the same women were tested). We converted means and their standard deviations to r. UK female raters.              |
| Rosenberg et al. 1983  | Chi-square values: A:12.3,6.3; B:16.4,43.0, r: 0.2328, 0.1134, 0.2688, 0.2962                                      | calculated from chies(), program compute.es                                   | 0.2193 | 1017 | 1017 | We computed r from Chi-squared values across for HLA-A and for HLA-B for the two collection centers, and then calculated the weighted mean effect size. USA pairs.                                                                                                        |



|                               |                                                                                        |                                                                                                               |        |     |     |                                                                                                                                                                                                                                                                                                                                                                                                                                                                                                                                                         |
|-------------------------------|----------------------------------------------------------------------------------------|---------------------------------------------------------------------------------------------------------------|--------|-----|-----|---------------------------------------------------------------------------------------------------------------------------------------------------------------------------------------------------------------------------------------------------------------------------------------------------------------------------------------------------------------------------------------------------------------------------------------------------------------------------------------------------------------------------------------------------------|
| Sans et al. 1994              | Chi-square values for A, B, C: 0.7107, 9.783, 0.0739; r: 0.0441, 0.1635, 0.0142; n=366 | calculated from chies(), program compute.es                                                                   | 0.0739 | 183 | 183 | Chi-square values for real couples vs random pairs for HLA-A, B and C were calculated and then r effect sizes were derived and the average was taken for the 3 loci. Chi Square values compared groups sharing 0 vs 1/2 alleles where Total is Obs and Noncouples is Exp. Since the couples were selected based on paternity testing, indicating a degree of uncertainty in the genetic father, we chose to use the full dataset and not exclude couples where the putative father was not the genetic father of the child being tested. Uruguay pairs. |
| Santos et al. 2005            | Chi-square=0.5341, n=369                                                               | <a href="http://www.lyonsmoris.com/ma1/">http://www.lyonsmoris.com/ma1/</a>                                   | -0.038 | 29  | 29  | We used Chi-squared goodness of fit test for the "pleasant" category for sweat olfactory session and only for females because detailed effect sizes for male smellers was not presented. 2x2 table (0 matching vs 2/3, pleasant vs unpleasant). Brazil females.                                                                                                                                                                                                                                                                                         |
| Saphire-Bernstein et al. 2017 | r=-0.240, n=44; r=-0.136, n=43; r=-0.590, n=43; r=-0.399, n=33                         | Beta coefficients                                                                                             | -0.337 | 43  | 43  | Weighted average of effect sizes taken from sexual responsivity, sexual adventurousness, satisfaction with partner as a turn-on, and in-pair attraction. N-target and N_rater were taken from Table 1. Couldn't find a way to extract effect sizes for males and females separately, as only contrasts were provided. Asian pairs.                                                                                                                                                                                                                      |
| Saphire-Bernstein et al. 2017 | r=0.025, n=165; r=0.074, n=165; r=-0.008, n=114                                        | Beta coefficients                                                                                             | 0.0347 | 165 | 165 | Weighted average of effect sizes taken from sexual responsivity, satisfaction with partner as a turn-on, and in-pair attraction. N-target and N_rater were taken from Table 1. USA pairs.                                                                                                                                                                                                                                                                                                                                                               |
| Sorokowska et al. 2018        | d=0.5, n=24                                                                            | Calculated r from Cohen's D ( <a href="http://www.lyonsmoris.com/ma1/">http://www.lyonsmoris.com/ma1/</a> )   | -0.243 | 47  | 24  | Data from authors. Preference for odours from individuals with fewer shared alleles. No HC using female German raters.                                                                                                                                                                                                                                                                                                                                                                                                                                  |
| Sorokowska et al. 2018        | d=0.04, n=28                                                                           | Calculated r from Cohen's D ( <a href="http://www.lyonsmoris.com/ma1/">http://www.lyonsmoris.com/ma1/</a> )   | -0.02  | 47  | 28  | Data from authors. Preference for odours from individuals with fewer shared alleles. HC using female German raters.                                                                                                                                                                                                                                                                                                                                                                                                                                     |
| Sorokowska et al. 2018        | F(2,122)=0.03                                                                          | Calculated r from F-statistic ( <a href="http://www.lyonsmoris.com/ma1/">http://www.lyonsmoris.com/ma1/</a> ) | 0.022  | 52  | 47  | Data from authors. Preference for odours from individuals with fewer shared alleles. Male German raters.                                                                                                                                                                                                                                                                                                                                                                                                                                                |
| Thornhill et al. 2003         | r=-0.033                                                                               | NA                                                                                                            | -0.033 | 48  | 77  | The correlation coefficient r was extracted directly. Male USA raters.                                                                                                                                                                                                                                                                                                                                                                                                                                                                                  |
| Thornhill et al. 2003         | r=0.025                                                                                | NA                                                                                                            | 0.025  | 55  | 65  | The correlation coefficient -r- was extracted directly from total number of alleles shared across 3 loci (A,B,DRB). No HC using female USA raters.                                                                                                                                                                                                                                                                                                                                                                                                      |

|                        |          |                                           |        |     |     |                                                                                                                                                                                                                                          |
|------------------------|----------|-------------------------------------------|--------|-----|-----|------------------------------------------------------------------------------------------------------------------------------------------------------------------------------------------------------------------------------------------|
| Wedekind and Furi 1997 | r=-0.051 | NA                                        | -0.051 | 6   | 63  | Pearson's r for men was estimated directly from Figure 2b using DataThief (B. Tummars, DataThief III. 2006 < <a href="http://datathief.org/">http://datathief.org/</a> >). Male Switzerland raters.                                      |
| Wedekind and Furi 1997 | r=-0.11  | NA                                        | -0.11  | 6   | 25  | Pearson's r for women not on birth control was estimated directly from Figure 2b using DataThief (B. Tummars, DataThief III. 2006 < <a href="http://datathief.org/">http://datathief.org/</a> >). No HC using female Switzerland raters. |
| Wedekind and Furi 1997 | r=0.0778 | NA                                        | 0.0778 | 6   | 23  | Pearson's r for women on birth control was estimated directly from Figure 2b using DataThief (B. Tummars, DataThief III. 2006 < <a href="http://datathief.org/">http://datathief.org/</a> >). HC using female Switzerland raters.        |
| Wedekind et al. 1995   | p=0.02   | calculated from pes(), program compute.es | 0.4815 | 23  | 18  | We calculated r from p-values for women taking hormonal contraception. Switzerland raters.                                                                                                                                               |
| Wedekind et al. 1995   | p=0.04   | calculated from pes(), program compute.es | -0.335 | 38  | 31  | We calculated r from p-values for women not taking HC. Switzerland raters.                                                                                                                                                               |
| Wu et al. 2018         | -0.003   | Mean of beta coefficients                 | -0.003 | 132 | 130 | Table 4. Female mean effect sizes from beta coefficients for Date offer and Overall mate desirability for Class I. Positive coefficients indicate preferences for MHC-dissimilarity. No HC using female Asian raters.                    |
| Wu et al. 2018         | -0.023   | Mean of beta coefficients                 | -0.023 | 132 | 130 | Table 4. Female mean effect sizes from beta coefficients for Date offer and Overall mate desirability for Class II. Positive coefficients (B) indicate preferences for MHC-dissimilarity. No HC using female Asian raters.               |
| Wu et al. 2018         | 0.002    | Mean of beta coefficients                 | 0.002  | 130 | 132 | Table 4. Male mean effect sizes from beta coefficients for Date offer and Overall mate desirability for Class I. Positive coefficients (B) indicate preferences for MHC-dissimilarity. Male Asian raters.                                |
| Wu et al. 2018         | 0.002    | Mean of beta coefficients                 | 0.002  | 130 | 132 | Table 4. Male mean effect sizes from beta coefficients for Date offer and Overall mate desirability for Class II. Positive coefficients (B) indicate preferences for MHC-dissimilarity. Male Asian raters.                               |
| Wu et al. 2018         | 0.0353   | Mean of beta coefficients                 | 0.0353 | 132 | 130 | Table 4. Female mean effect sizes from beta coefficients for body scent attractiveness for Class I. Positive coefficients (B) indicate preferences for MHC-dissimilarity. No HC using Asian female raters.                               |
| Wu et al. 2018         | 0.0115   | Mean of beta coefficients                 | 0.0115 | 132 | 130 | Table 4. Female mean effect sizes from beta coefficients for body scent attractiveness for Class II. Positive coefficients (B) indicate preferences for MHC-dissimilarity. No HC using Asian female raters.                              |
| Wu et al. 2018         | -0.0233  | Mean of beta coefficients                 | -0.023 | 130 | 132 | Table 4. Male mean effect sizes from beta coefficients for body scent attractiveness for Class I. Positive coefficients (B) indicate preferences for MHC-dissimilarity. Male Asian raters.                                               |

|                |        |                           |        |     |     |                                                                                                                                                                                             |
|----------------|--------|---------------------------|--------|-----|-----|---------------------------------------------------------------------------------------------------------------------------------------------------------------------------------------------|
| Wu et al. 2018 | 0.0323 | Mean of beta coefficients | 0.0323 | 130 | 132 | Table 4. Male mean effect sizes from beta coefficients for body scent attractiveness for Class II. Positive coefficients (B) indicate preferences for MHC-dissimilarity. Male Asian raters. |
|----------------|--------|---------------------------|--------|-----|-----|---------------------------------------------------------------------------------------------------------------------------------------------------------------------------------------------|

## Details of data extraction and effect size averaging for neutral markers from MHC studies

(-) indicates preference/choice for dissimilarity in the original study and (+) indicates preference/choice for similarity in the original study. Final effect sizes were calculated to reflect the direction of original preference (- for dissimilarity, + for similarity).

| Author                       | Genome-wide test statistic (control for socio-demographic factors influencing mate choice)                                                             | Conversion Method Used                                                                                                                            | corr neutral | N target | N rater | Details                                                      |
|------------------------------|--------------------------------------------------------------------------------------------------------------------------------------------------------|---------------------------------------------------------------------------------------------------------------------------------------------------|--------------|----------|---------|--------------------------------------------------------------|
| Cretu-Stancu et al. 2018     | North: N=95 pairs, p=0.48 (pairs less similar); Center: N=69 pairs, p=0.545 (pairs less similar); South: N=47 pairs, p=0.431 (pair less similar = neg) | Individual effect sizes calculated from pes(), program compute.es; 1-sided p-value. Weighted mean = $\text{Sum}(N_i \cdot r_i) / \text{Sum}(N_i)$ | -0.00895     | 239      | 239     | Took the weighted mean of 15 effect sizes by province.       |
| Dandine-Roulland et al. 2019 | p=0.033, p=0.975 (+)                                                                                                                                   | Calculated from pes(), program compute.es; 2-sided p-value                                                                                        | 0.126        | 36       | 36      | Mean p-value(a) from Table 1 and Table 2. Belgium pairs.     |
| Dandine-Roulland et al. 2019 | p=0.032, p=0.372 (+)                                                                                                                                   | Calculated from pes(), program compute.es; 2-sided p-value                                                                                        | 0.1155       | 86       | 86      | Mean p-value(a) from Table 1 and Table 2. Ireland pairs.     |
| Dandine-Roulland et al. 2019 | p=0.009 (+), p=0.030 (-)                                                                                                                               | Calculated from pes(), program compute.es; 2-sided p-value                                                                                        | 0.015        | 108      | 108     | Mean p-value(a) from Table 1 and Table 2. Germany pairs.     |
| Dandine-Roulland et al. 2019 | p=0.001, p=0.148 (+)                                                                                                                                   | Calculated from pes(), program compute.es; 2-sided p-value                                                                                        | 0.096        | 302      | 302     | Mean p-value(a) from Table 1 and Table 2. Netherlands pairs. |
| Dandine-Roulland et al. 2019 | p=0.696, p=0.991 (-)                                                                                                                                   | Calculated from pes(), program compute.es; 2-sided p-value                                                                                        | -0.013       | 126      | 126     | Mean p-value(a) from Table 1 and Table 2. UK pairs.          |
| Dandine-Roulland et al. 2019 | p=0.734, p=0.863 (+)                                                                                                                                   | Calculated from pes(), program compute.es; 2-sided p-value                                                                                        | 0.022        | 69       | 69      | Mean p-value(a) from Table 1 and Table 2. Spain pairs.       |
| Dandine-Roulland et al. 2019 | p=0.0001, p=0.178 (+)                                                                                                                                  | Calculated from pes(), program compute.es; 2-sided p-value                                                                                        | 0.147        | 156      | 156     | Mean p-value(a) from Table 1 and Table 2. Israel pairs.      |
| Qiao et al. 2018             | p=0.0081 (-)                                                                                                                                           | Calculated from pes(), program                                                                                                                    | -0.063       | 872      | 872     | Calculated r from p-value. European pairs.                   |

|                              |                                                                                                                   |                                                                                                                                               |                        |                 |                |                                                                                                                                                                                                                      |
|------------------------------|-------------------------------------------------------------------------------------------------------------------|-----------------------------------------------------------------------------------------------------------------------------------------------|------------------------|-----------------|----------------|----------------------------------------------------------------------------------------------------------------------------------------------------------------------------------------------------------------------|
|                              |                                                                                                                   | compute.es; 2-sided p-value                                                                                                                   |                        |                 |                |                                                                                                                                                                                                                      |
| Chaix et al. 2008            | p=0.739 (-)                                                                                                       | Calculated from pes(), program compute.es; 2-sided p-value                                                                                    | -0.045                 | 28              | 28             | Calculated r from p-value. European pairs.                                                                                                                                                                           |
| Chaix et al. 2008            | p=0.001 (+)                                                                                                       | Calculated from pes(), program compute.es; 2-sided p-value                                                                                    | 0.429                  | 27              | 27             | Calculated r from p-value. Yoruban pairs.                                                                                                                                                                            |
| <b>Author</b>                | <b>Genome-wide test statistic (is MHC unique for real pairs?)</b>                                                 | <b>Conversion Method Used</b>                                                                                                                 | <b>corr MHC unique</b> | <b>N target</b> | <b>N rater</b> | <b>Details</b>                                                                                                                                                                                                       |
| Cretu-Stancu et al. 2018     | genomic size: N=239, p=0.08 ; total number of markers: N=239, p=0.02 (MHC more dissimilar than genome-wide = neg) | Individual effect sizes calculated from pes(), program compute.es; 1-sided p-value. Weighted mean = $\text{Sum}(N_i * r_i) / \text{Sum}(N_i)$ | -0.079                 | 239             | 239            | Weighted mean of regions based on genomic size and total number of markers in the region.                                                                                                                            |
| Dandine-Roulland et al. 2019 | p=0.264, p=0.241 (-)                                                                                              | Calculated from pes(), program compute.es; 2-sided p-value                                                                                    | -0.135                 | 36              | 36             | Mean p-value(c) from Table 1 and Table 2. Belgium pairs.                                                                                                                                                             |
| Dandine-Roulland et al. 2019 | p=0.003, p=0.052 (-)                                                                                              | Calculated from pes(), program compute.es; 2-sided p-value                                                                                    | -0.186                 | 86              | 86             | Mean p-value(c) from Table 1 and Table 2. Ireland pairs.                                                                                                                                                             |
| Dandine-Roulland et al. 2019 | p=0.073, p=0.241 (-)                                                                                              | Calculated from pes(), program compute.es; 2-sided p-value                                                                                    | -0.101                 | 108             | 108            | Mean p-value(c) from Table 1 and Table 2. Germany pairs.                                                                                                                                                             |
| Dandine-Roulland et al. 2019 | p=0.010, p=0.051 (-)                                                                                              | Calculated from pes(), program compute.es; 2-sided p-value                                                                                    | -0.092                 | 302             | 302            | Mean p-value(c) from Table 1 and Table 2. Netherlands pairs.                                                                                                                                                         |
| Dandine-Roulland et al. 2019 | p=0.080, p=0.062 (-)                                                                                              | Calculated from pes(), program compute.es; 2-sided p-value                                                                                    | -0.1135                | 126             | 126            | Mean p-value(c) from Table 1 and Table 2. UK pairs.                                                                                                                                                                  |
| Dandine-Roulland et al. 2019 | p=0.120, p=0.079 (-)                                                                                              | Calculated from pes(), program compute.es; 2-sided p-value                                                                                    | -0.1405                | 69              | 69             | Mean p-value(c) from Table 1 and Table 2. Spain pairs.                                                                                                                                                               |
| Dandine-Roulland et al. 2019 | p=0.625, p=0.657 (+)                                                                                              | Calculated from pes(), program compute.es; 2-sided p-value                                                                                    | 0.0265                 | 156             | 156            | Mean p-value(c) from Table 1 and Table 2. Israel pairs.                                                                                                                                                              |
| Chaix et al. 2008            | p=0.004, p=0.001 (-)                                                                                              | Calculated from pes(), program compute.es; 2-sided p-value.                                                                                   | -0.3975                | 28              | 28             | Mean effect size for similar sized genomic window and similar recombination rate. Only 0.4% and 0.1% of the genomic windows had higher dissimilarity than MHC. European pairs.                                       |
| Chaix et al. 2008            | p=0.09, p=0.17 (+)                                                                                                | Calculated from pes(), program compute.es; 2-sided p-value.                                                                                   | 0.2075                 | 27              | 27             | Mean effect size for similar sized genomic window and similar recombination rate. 9% and 17% of the genomic windows had higher similarity than MHC. Yoruban pairs.                                                   |
| Derti et al. 2010            | p=0.016, p=0.035 (-)                                                                                              | Calculated from pes(), program compute.es; 2-sided p-value                                                                                    | -0.2815                | 24              | 24             | From Table S4 for unphased Hap3 Europeans. Mean effect size for similar sized genomic window and similar recombination rate. 1.6% and 3.5% of the genomic windows had higher dissimilarity than MHC. European pairs. |

## List of relevant papers excluded from the present study

| Publication              | Details                                                                                                                                                                                                                                                                                                                                                 |
|--------------------------|---------------------------------------------------------------------------------------------------------------------------------------------------------------------------------------------------------------------------------------------------------------------------------------------------------------------------------------------------------|
| Giphart and D'Amaro 1983 | Some evidence for disassortative mating (different antigens at 4 genes are more frequent than expected out of 30 genes), but no way to extract effect size because the data for the pairwise tests is not available.                                                                                                                                    |
| Khankhanian et al. 2010  | This study was excluded because the sample population consisted of couples with a child affected by multiple sclerosis (MS). As MS is a complex genetic disease with strong associations with MHC class II genes, the sample population has higher frequencies of specific MHC risk alleles and is not a fair representation of the general population. |
| Laurent et al. 2012      | This study did not present full test statistics for HLA region. It presented genes showing extreme similarity or dissimilarity based on 2 testing approaches (permutation and intergenic). Therefore, we could not calculate effect sizes.                                                                                                              |
| Zaidi et al. 2019        | This study tested if height and facial masculinity are correlated with MHC heterozygosity, but did not test if these 'male ornaments' were correlated with MHC dissimilarity.                                                                                                                                                                           |

## Supplementary Tables

**Table S1. Estimated effect of human genomic MHC similarity on mating using moderators.**

The estimates are derived from the univariate model containing the moderator as a fixed effect and study ID and sampling error (variance) as random effects. The intercept has been removed from the model, so each trait is tested against zero effect. Significant terms are in bold.

| Fixed factor           | Category        | N  | Estimate | l-95% CI | u-95% CI | p-value | R <sup>2</sup> % |
|------------------------|-----------------|----|----------|----------|----------|---------|------------------|
| Year                   | (Intercept)     | 17 | -0.027   | -0.077   | 0.024    | 0.302   | 0.00%            |
|                        | Year            |    | 0.000    | -0.023   | 0.024    | 0.981   |                  |
| Class                  | Both            | 13 | -0.031   | -0.080   | 0.019    | 0.222   | 0.00%            |
|                        | Class 1         | 2  | -0.001   | -0.132   | 0.131    | 0.994   |                  |
|                        | Class 2         | 2  | -0.011   | -0.142   | 0.121    | 0.875   |                  |
| Rater                  | Female          | 2  | -0.013   | -0.144   | 0.118    | 0.846   | 0.00%            |
|                        | Male            | 2  | 0.002    | -0.130   | 0.134    | 0.976   |                  |
|                        | Pairs           | 13 | -0.031   | -0.080   | 0.019    | 0.222   |                  |
| Number MHC loci        | (Intercept)     | 17 | 0.201    | -0.530   | 0.933    | 0.589   | 0.00%            |
|                        | Number MHC loci |    | -0.027   | -0.113   | 0.059    | 0.541   |                  |
| Hormonal Contraception | Male            | 2  | 0.002    | -0.130   | 0.134    | 0.976   | 0.00%            |
|                        | No HC           | 2  | -0.013   | -0.144   | 0.118    | 0.846   |                  |
|                        | Unknown         | 13 | -0.031   | -0.080   | 0.019    | 0.222   |                  |
| Population             | Asian           | 4  | -0.006   | -0.145   | 0.134    | 0.938   | 0.00%            |
|                        | Belgium         | 1  | -0.089   | -0.443   | 0.265    | 0.622   |                  |
|                        | European        | 3  | -0.046   | -0.163   | 0.072    | 0.445   |                  |
|                        | Germany         | 1  | -0.059   | -0.272   | 0.154    | 0.589   |                  |
|                        | Ireland         | 1  | -0.116   | -0.351   | 0.118    | 0.330   |                  |
|                        | Israel          | 1  | 0.054    | -0.130   | 0.237    | 0.568   |                  |
|                        | Netherlands     | 3  | -0.023   | -0.128   | 0.082    | 0.670   |                  |
|                        | Spain           | 1  | -0.090   | -0.349   | 0.169    | 0.495   |                  |
|                        | UK              | 1  | -0.066   | -0.266   | 0.134    | 0.519   |                  |
|                        | Yoruban         | 1  | 0.185    | -0.229   | 0.599    | 0.381   |                  |
| Region code            | EUR             | 11 | -0.041   | -0.106   | 0.024    | 0.216   | 0.00%            |
|                        | NAF             | 1  | 0.178    | -0.231   | 0.586    | 0.394   |                  |
|                        | SEA             | 4  | -0.006   | -0.128   | 0.116    | 0.929   |                  |
|                        | WAS             | 1  | 0.058    | -0.114   | 0.230    | 0.511   |                  |

|                             |                             |    |              |              |              |              |         |
|-----------------------------|-----------------------------|----|--------------|--------------|--------------|--------------|---------|
| Background                  | (Intercept)                 | 12 | -0.033       | -0.108       | 0.041        | 0.384        | 0.00%   |
|                             | Background                  |    | 0.276        | -0.373       | 0.926        | 0.405        |         |
| MHC   background            | (Intercept)                 | 12 | 0.035        | -0.062       | 0.131        | 0.484        | 19.00%  |
|                             | <b>MHC  <br/>background</b> |    | <b>0.778</b> | <b>0.102</b> | <b>1.453</b> | <b>0.024</b> |         |
| ln(N of rater)              | (Intercept)                 | 17 | -0.114       | -0.365       | 0.138        | 0.375        | 0.00%   |
|                             | ln(N of rater)              |    | 0.016        | -0.029       | 0.061        | 0.487        |         |
| Permutations                | (Intercept)                 | 17 | -0.093       | -0.347       | 0.161        | 0.473        | 0.00%   |
|                             | Permutations                |    | 0.017        | -0.046       | 0.080        | 0.599        |         |
| Phi-hat cryptic relatedness | (Intercept)                 | 13 | 0.012        | -0.057       | 0.082        | 0.734        | 100.00% |
|                             | Phi-hat cryptic relatedness |    | -0.686       | -1.554       | 0.183        | 0.122        |         |
| Span of MHC (Mb)            | (Intercept)                 | 17 | -0.052       | -0.185       | 0.082        | 0.448        | 0.00%   |
|                             | Span of MHC (Mb)            |    | 0.006        | -0.025       | 0.038        | 0.693        |         |
| Intercept-only model        | (Intercept)                 | 17 | -0.027       | -0.067       | 0.013        | 0.191        |         |

**Table S2. Estimated effect of human MHC similarity on relationship satisfaction using moderators.**

The estimates are derived from the univariate model containing the moderator as a fixed effect and study ID and sampling error (variance) as random effects. The intercept has been removed from the model, so each trait is tested against zero effect. Significant terms are in bold.

| Fixed factor           | Category              | N        | Estimate      | l-95% CI      | u-95% CI      | p-value      | R <sup>2</sup> % |
|------------------------|-----------------------|----------|---------------|---------------|---------------|--------------|------------------|
| Year                   | (Intercept)           | 9        | -0.090        | -0.159        | -0.021        | 0.011        | 89.45%           |
|                        | <b>Year</b>           |          | <b>0.018</b>  | <b>0.000</b>  | <b>0.035</b>  | <b>0.051</b> |                  |
| Class                  | Both                  | 5        | -0.136        | -0.284        | 0.012         | 0.072        | 0.00%            |
|                        | Class 1               | 2        | -0.075        | -0.243        | 0.093         | 0.379        |                  |
|                        | Class 2               | 2        | 0.020         | -0.148        | 0.188         | 0.815        |                  |
| Rater                  | Female                | 3        | -0.124        | -0.306        | 0.059         | 0.184        | 0.00%            |
|                        | Male                  | 3        | -0.054        | -0.236        | 0.129         | 0.564        |                  |
|                        | Pairs                 | 3        | -0.093        | -0.297        | 0.110         | 0.369        |                  |
| Hormonal Contraception | Male                  | 1        | -0.126        | -0.424        | 0.172         | 0.408        | 85.02%           |
|                        | <b>No HC</b>          | <b>2</b> | <b>-0.261</b> | <b>-0.472</b> | <b>-0.050</b> | <b>0.015</b> |                  |
|                        | Unknown               | 6        | -0.031        | -0.094        | 0.031         | 0.326        |                  |
| Population             | <b>Asian</b>          | <b>1</b> | <b>-0.448</b> | <b>-0.841</b> | <b>-0.054</b> | <b>0.026</b> | 0.00%            |
|                        | Germany               | 4        | -0.028        | -0.340        | 0.285         | 0.862        |                  |
|                        | USA                   | 4        | -0.089        | -0.334        | 0.157         | 0.479        |                  |
| Region code            | EUR                   | 4        | -0.028        | -0.340        | 0.285         | 0.862        | 0.00%            |
|                        | NAM                   | 4        | -0.089        | -0.334        | 0.157         | 0.479        |                  |
|                        | <b>SEA</b>            | <b>1</b> | <b>-0.448</b> | <b>-0.841</b> | <b>-0.054</b> | <b>0.026</b> |                  |
| ln(N of rater)         | (Intercept)           | 9        | -0.720        | -1.242        | -0.199        | 0.007        | 84.81%           |
|                        | <b>ln(N of rater)</b> |          | <b>0.128</b>  | <b>0.029</b>  | <b>0.228</b>  | <b>0.012</b> |                  |
| Intercept-only model   | (Intercept)           | 9        | -0.078        | -0.180        | 0.023         | 0.131        |                  |



**Table S3. Estimated effect of human MHC similarity on odour preferences using moderators.**

The estimates are derived from the univariate model containing the moderator as a fixed effect and study ID and sampling error (variance) as random effects. The intercept has been removed from the model, so each trait is tested against zero effect.

| Fixed factor           | Category        | N  | Estimate | l-95% CI | u-95% CI | p-value | R <sup>2</sup> % |
|------------------------|-----------------|----|----------|----------|----------|---------|------------------|
| Year                   | (Intercept)     | 23 | -0.020   | -0.080   | 0.040    | 0.513   | 10.23%           |
|                        | Year            |    | 0.000    | -0.008   | 0.008    | 0.989   |                  |
| Class                  | Both            | 11 | -0.008   | -0.108   | 0.092    | 0.877   | 0.00%            |
|                        | Class 1         | 8  | -0.058   | -0.123   | 0.008    | 0.083   |                  |
|                        | Class 2         | 4  | 0.019    | -0.053   | 0.091    | 0.608   |                  |
| Rater                  | Female          | 15 | -0.029   | -0.086   | 0.029    | 0.327   | 15.78%           |
|                        | Male            | 8  | -0.009   | -0.075   | 0.057    | 0.790   |                  |
| Number MHC loci        | (Intercept)     | 23 | -0.063   | -0.156   | 0.030    | 0.185   | 0.00%            |
|                        | Number MHC loci |    | 0.010    | -0.009   | 0.029    | 0.309   |                  |
| Hormonal Contraception | Male            | 6  | 0.004    | -0.095   | 0.103    | 0.939   | 0.00%            |
|                        | No HC           | 8  | -0.026   | -0.113   | 0.062    | 0.563   |                  |
|                        | HC              | 4  | 0.034    | -0.130   | 0.198    | 0.682   |                  |
|                        | Unknown         | 5  | -0.035   | -0.096   | 0.027    | 0.273   |                  |
| Population             | Asian           | 4  | 0.014    | -0.073   | 0.101    | 0.751   | 0.00%            |
|                        | Brazil          | 1  | -0.038   | -0.422   | 0.346    | 0.846   |                  |
|                        | European        | 1  | 0.024    | -0.290   | 0.338    | 0.882   |                  |
|                        | Germany         | 8  | -0.039   | -0.098   | 0.019    | 0.191   |                  |
|                        | Switzerland     | 5  | -0.030   | -0.275   | 0.215    | 0.809   |                  |
|                        | UK              | 2  | -0.014   | -0.159   | 0.131    | 0.852   |                  |
|                        | USA             | 2  | -0.002   | -0.201   | 0.197    | 0.985   |                  |
| Region code            | EUR             | 16 | -0.034   | -0.086   | 0.019    | 0.207   | 0.00%            |
|                        | NAM             | 2  | -0.002   | -0.201   | 0.197    | 0.985   |                  |
|                        | SAM             | 1  | -0.038   | -0.422   | 0.346    | 0.846   |                  |
|                        | SEA             | 4  | 0.014    | -0.073   | 0.101    | 0.751   |                  |
| ln(N of rater)         | (Intercept)     | 23 | -0.027   | -0.326   | 0.271    | 0.859   | 0.00%            |
|                        | ln(N of rater)  |    | 0.001    | -0.059   | 0.061    | 0.963   |                  |
| Intercept-only model   | (Intercept)     | 23 | -0.020   | -0.064   | 0.023    | 0.360   |                  |

**Table S4. Estimated effect of non-HC using human MHC similarity on odour preferences using moderators.**

The estimates are derived from the univariate model containing the moderator as a fixed effect and study ID and sampling error (variance) as random effects. The intercept has been removed from the model, so each trait is tested against zero effect. Significant terms are in bold.

| Fixed factor           | Category           | N        | Estimate      | l-95% CI      | u-95% CI      | p-value      | R <sup>2</sup> % |
|------------------------|--------------------|----------|---------------|---------------|---------------|--------------|------------------|
| Year                   | (Intercept)        | 19       | -0.048        | -0.116        | 0.019         | 0.163        | 0.00%            |
|                        | Year               |          | 0.004         | -0.005        | 0.014         | 0.356        |                  |
| Class                  | Both               | 8        | -0.031        | -0.146        | 0.085         | 0.602        | 0.00%            |
|                        | Class 1            | 7        | -0.059        | -0.126        | 0.007         | 0.081        |                  |
|                        | Class 2            | 4        | 0.019         | -0.053        | 0.091         | 0.608        |                  |
| Rater                  | Female             | 11       | -0.038        | -0.099        | 0.024         | 0.230        | 0.00%            |
|                        | Male               | 8        | -0.009        | -0.075        | 0.057         | 0.790        |                  |
| Number MHC loci        | (Intercept)        | 19       | -0.075        | -0.172        | 0.023         | 0.132        | 0.00%            |
|                        | Number MHC loci    |          | 0.012         | -0.008        | 0.031         | 0.253        |                  |
| Hormonal Contraception | Male               | 6        | 0.004         | -0.095        | 0.103         | 0.939        | 0.00%            |
|                        | No HC              | 8        | -0.026        | -0.113        | 0.062         | 0.563        |                  |
|                        | Unknown            | 5        | -0.035        | -0.096        | 0.027         | 0.273        |                  |
| Population             | Asian              | 4        | 0.014         | -0.073        | 0.101         | 0.751        | 0.00%            |
|                        | Brazil             | 1        | -0.038        | -0.422        | 0.346         | 0.846        |                  |
|                        | European           | 1        | 0.024         | -0.290        | 0.338         | 0.882        |                  |
|                        | Germany            | 7        | -0.040        | -0.100        | 0.020         | 0.191        |                  |
|                        | <b>Switzerland</b> | <b>3</b> | <b>-0.309</b> | <b>-0.615</b> | <b>-0.003</b> | <b>0.048</b> |                  |
|                        | UK                 | 1        | 0.023         | -0.167        | 0.212         | 0.815        |                  |
|                        | USA                | 2        | -0.002        | -0.201        | 0.197         | 0.985        |                  |
| Region code            | EUR                | 12       | -0.041        | -0.097        | 0.014         | 0.142        | 0.00%            |
|                        | NAM                | 2        | -0.002        | -0.201        | 0.197         | 0.985        |                  |
|                        | SAM                | 1        | -0.038        | -0.422        | 0.346         | 0.846        |                  |
|                        | SEA                | 4        | 0.014         | -0.073        | 0.101         | 0.751        |                  |
| ln(N of rater)         | (Intercept)        | 19       | -0.214        | -0.615        | 0.187         | 0.295        | 0.00%            |
|                        | ln(N of rater)     |          | 0.038         | -0.042        | 0.119         | 0.351        |                  |
| Intercept-only model   | (Intercept)        | 19       | -0.024        | -0.069        | 0.021         | 0.289        |                  |

**Table S5. Estimated effect of human MHC similarity on mate selection using moderators.**

The estimates come from the univariate model containing the moderator as a fixed effect and study ID and sampling error (variance) as random effects. The intercept has been removed from the models with factor moderators, so each trait is tested against zero effect. Significant terms are in bold.

| Fixed factor           | Category         | N        | Estimate     | l-95% CI     | u-95% CI     | p-value      | R <sup>2</sup> % |
|------------------------|------------------|----------|--------------|--------------|--------------|--------------|------------------|
| Year                   | (Intercept)      | 55       | 0.004        | -0.060       | 0.067        | 0.913        | 0.00%            |
|                        | Year             |          | -0.002       | -0.006       | 0.003        | 0.494        |                  |
| Class                  | Both             | 31       | -0.009       | -0.076       | 0.059        | 0.795        | 0.00%            |
|                        | Class 1          | 16       | 0.038        | -0.044       | 0.119        | 0.364        |                  |
|                        | Class 2          | 8        | 0.097        | -0.006       | 0.200        | 0.064        |                  |
| Rater                  | Female           | 16       | -0.068       | -0.171       | 0.035        | 0.197        | 7.17%            |
|                        | Male             | 13       | -0.033       | -0.139       | 0.074        | 0.550        |                  |
|                        | Pairs            | 26       | 0.042        | -0.025       | 0.109        | 0.218        |                  |
| Number MHC loci        | (Intercept)      | 55       | 0.080        | -0.030       | 0.190        | 0.153        | 8.10%            |
|                        | Number MHC loci  |          | -0.015       | -0.036       | 0.006        | 0.163        |                  |
| Hormonal Contraception | Male             | 9        | -0.034       | -0.160       | 0.093        | 0.602        | 3.15%            |
|                        | No HC            | 13       | -0.059       | -0.171       | 0.053        | 0.301        |                  |
|                        | Unknown          | 33       | 0.038        | -0.030       | 0.107        | 0.272        |                  |
| Population             | Asian            | 9        | -0.113       | -0.312       | 0.087        | 0.268        | 2.77%            |
|                        | Belgium          | 1        | -0.009       | -0.372       | 0.354        | 0.961        |                  |
|                        | Brazil           | 1        | -0.038       | -0.489       | 0.413        | 0.869        |                  |
|                        | European         | 6        | -0.053       | -0.178       | 0.073        | 0.411        |                  |
|                        | Germany          | 12       | -0.016       | -0.163       | 0.131        | 0.833        |                  |
|                        | Ireland          | 1        | -0.037       | -0.285       | 0.212        | 0.772        |                  |
|                        | <b>Israel</b>    | <b>3</b> | <b>0.207</b> | <b>0.048</b> | <b>0.365</b> | <b>0.011</b> |                  |
|                        | Japan            | 1        | 0.072        | -0.193       | 0.336        | 0.595        |                  |
|                        | Netherlands      | 3        | 0.027        | -0.119       | 0.173        | 0.721        |                  |
|                        | South Amerindian | 1        | 0.060        | -0.215       | 0.335        | 0.669        |                  |
|                        | Spain            | 1        | -0.010       | -0.281       | 0.261        | 0.941        |                  |
|                        | Sweden           | 1        | 0.013        | -0.232       | 0.259        | 0.916        |                  |
|                        | Switzerland      | 3        | -0.297       | -0.662       | 0.069        | 0.112        |                  |
|                        | UK               | 2        | 0.016        | -0.162       | 0.195        | 0.858        |                  |
|                        | Uruguay          | 1        | 0.074        | -0.203       | 0.351        | 0.601        |                  |
|                        | USA              | 8        | 0.058        | -0.068       | 0.184        | 0.368        |                  |
|                        | Yoruban          | 1        | 0.238        | -0.211       | 0.687        | 0.299        |                  |
| Region code            | EUR              | 30       | -0.028       | -0.097       | 0.040        | 0.413        | 30.14%           |

|                      |                       |           |               |               |               |              |        |
|----------------------|-----------------------|-----------|---------------|---------------|---------------|--------------|--------|
|                      | NAF                   | 1         | 0.227         | -0.212        | 0.665         | 0.311        |        |
|                      | NAM                   | 8         | 0.059         | -0.055        | 0.172         | 0.311        |        |
|                      | NEA                   | 1         | 0.072         | -0.161        | 0.305         | 0.547        |        |
|                      | SAM                   | 3         | 0.052         | -0.109        | 0.214         | 0.525        |        |
|                      | SEA                   | 9         | -0.092        | -0.270        | 0.086         | 0.312        |        |
|                      | <b>WAS</b>            | <b>3</b>  | <b>0.205</b>  | <b>0.068</b>  | <b>0.343</b>  | <b>0.003</b> |        |
| Background           | (Intercept)           | 55        | 0.035         | -0.158        | 0.228         | 0.722        | 0.00%  |
|                      | Background            |           | 0.575         | -0.219        | 1.369         | 0.156        |        |
| ln(N of rater)       | <b>(Intercept)</b>    | <b>55</b> | <b>-0.293</b> | <b>-0.514</b> | <b>-0.072</b> | <b>0.009</b> | 28.96% |
|                      | <b>ln(N of rater)</b> |           | <b>0.058</b>  | <b>0.017</b>  | <b>0.098</b>  | <b>0.005</b> |        |
| Intercept-only model | (Intercept)           | 55        | 0.012         | -0.046        | 0.070         | 0.685        |        |

**Table S6. Testing for publication bias using Egger's regression test of funnel plot asymmetry.**

This tests for a linear regression between the standardized effect size ( $Z_r$ ) and the standard error ( $\sqrt{\text{variance}}$ ), using a random-effects meta-regression model. A significant value indicates that the standard error predicts the effect size, and this indicates asymmetry in the funnel plot and suggests publication bias may be present. N is number of effect sizes, z is the test statistic. Significant terms are in bold.

| <b>Egger's regression test for funnel plot asymmetry</b> | <b>N</b>  | <b>z</b>      | <b>p-value</b> |
|----------------------------------------------------------|-----------|---------------|----------------|
| Genomic studies                                          | 17        | -0.892        | 0.373          |
| <b>Relationship satisfaction</b>                         | <b>9</b>  | <b>-2.644</b> | <b>0.008</b>   |
| Odour preference                                         | 23        | 0.351         | 0.726          |
| Odour preference (No HC)                                 | 19        | -0.354        | 0.724          |
| <b>Mate selection (No HC)</b>                            | <b>55</b> | <b>-2.592</b> | <b>0.010</b>   |

# Supplementary Figures

**Figure S1. Forest plots of standardized effect sizes by study for different datasets.**

Points are proportional to inverse standard error. N, sample size.

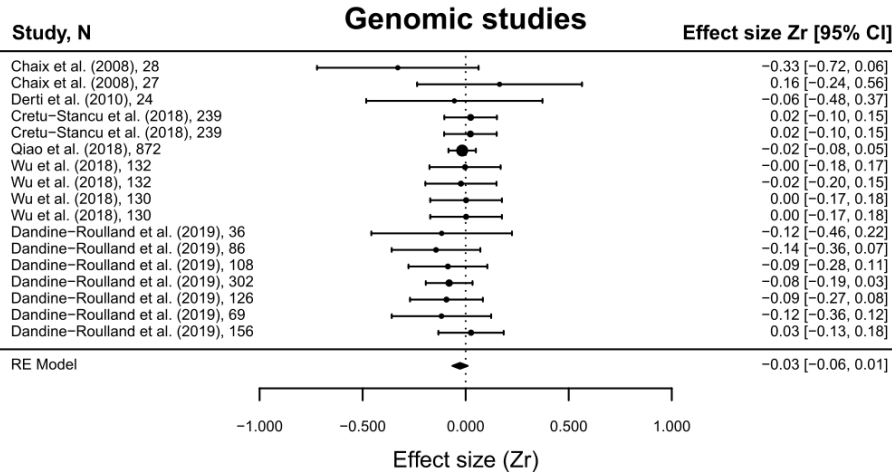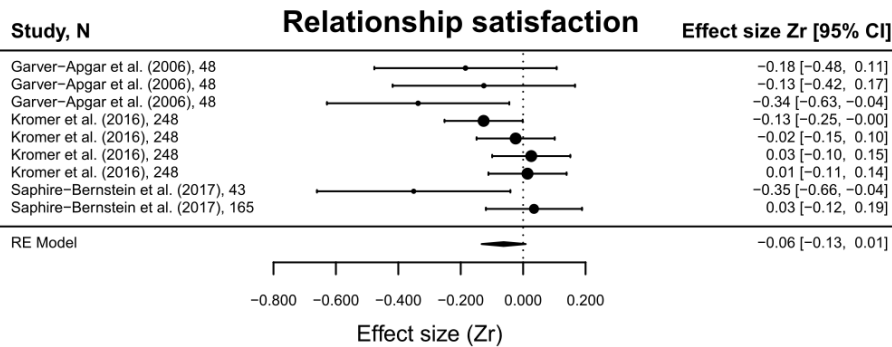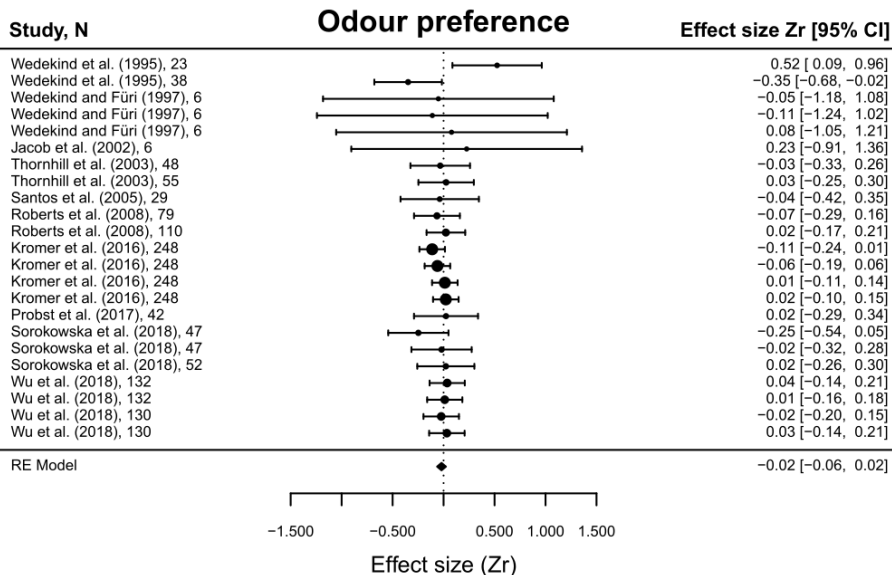

Study, N

Mate selection

Effect size Zr [95% CI]

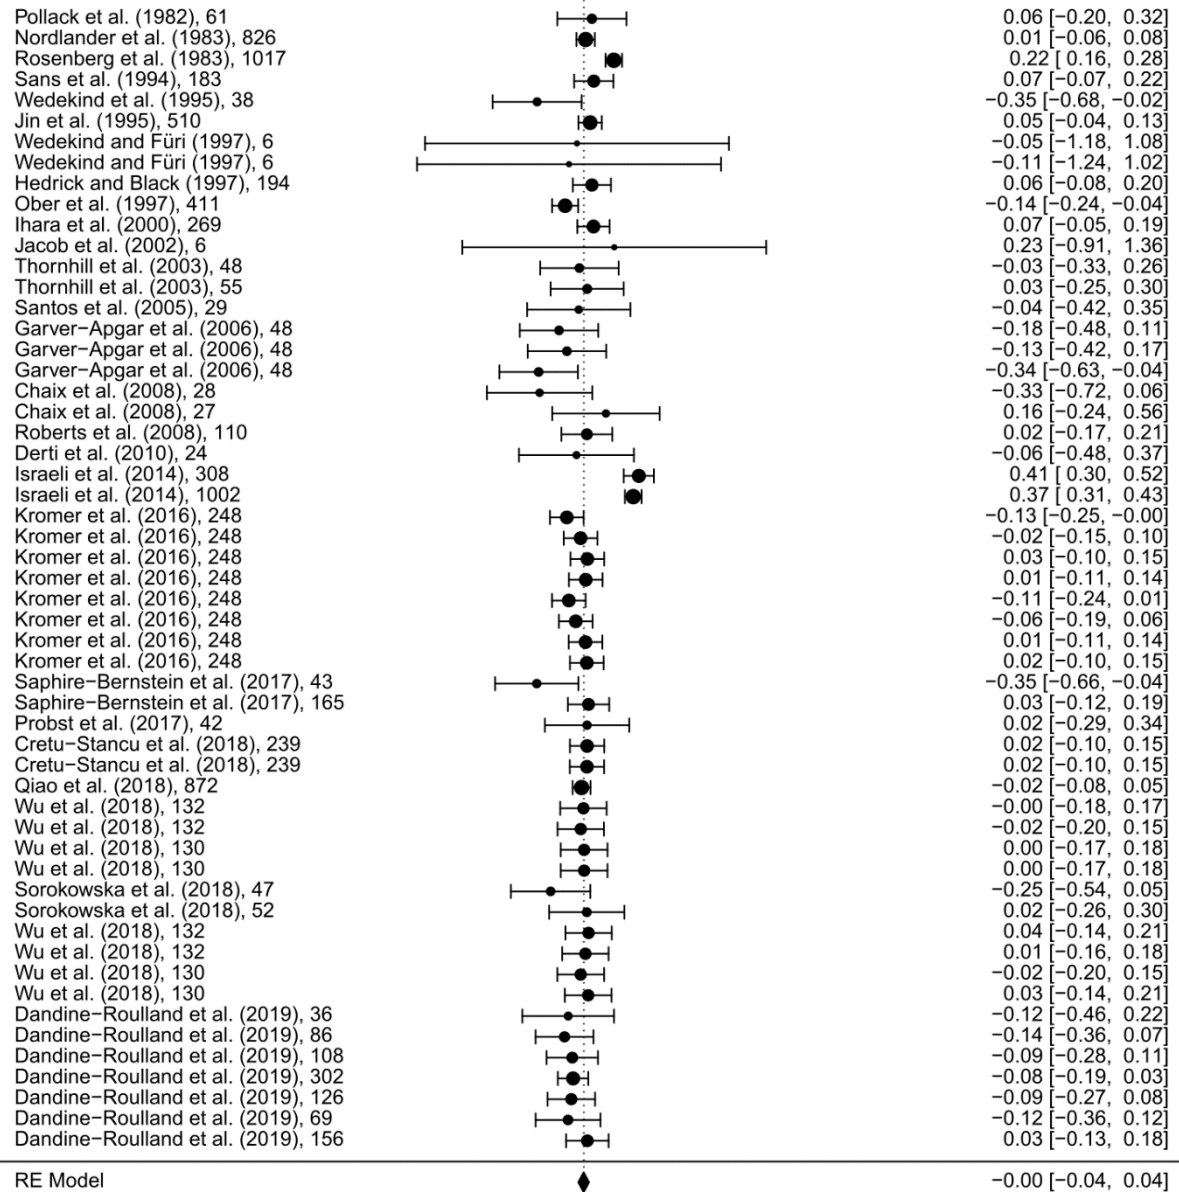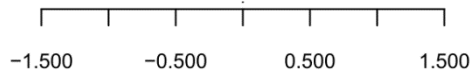

**Figure S2. Trim and fill contour-enhanced funnel plots for the different datasets.**

Black points are observed effect sizes and white points are filled in effects studies.

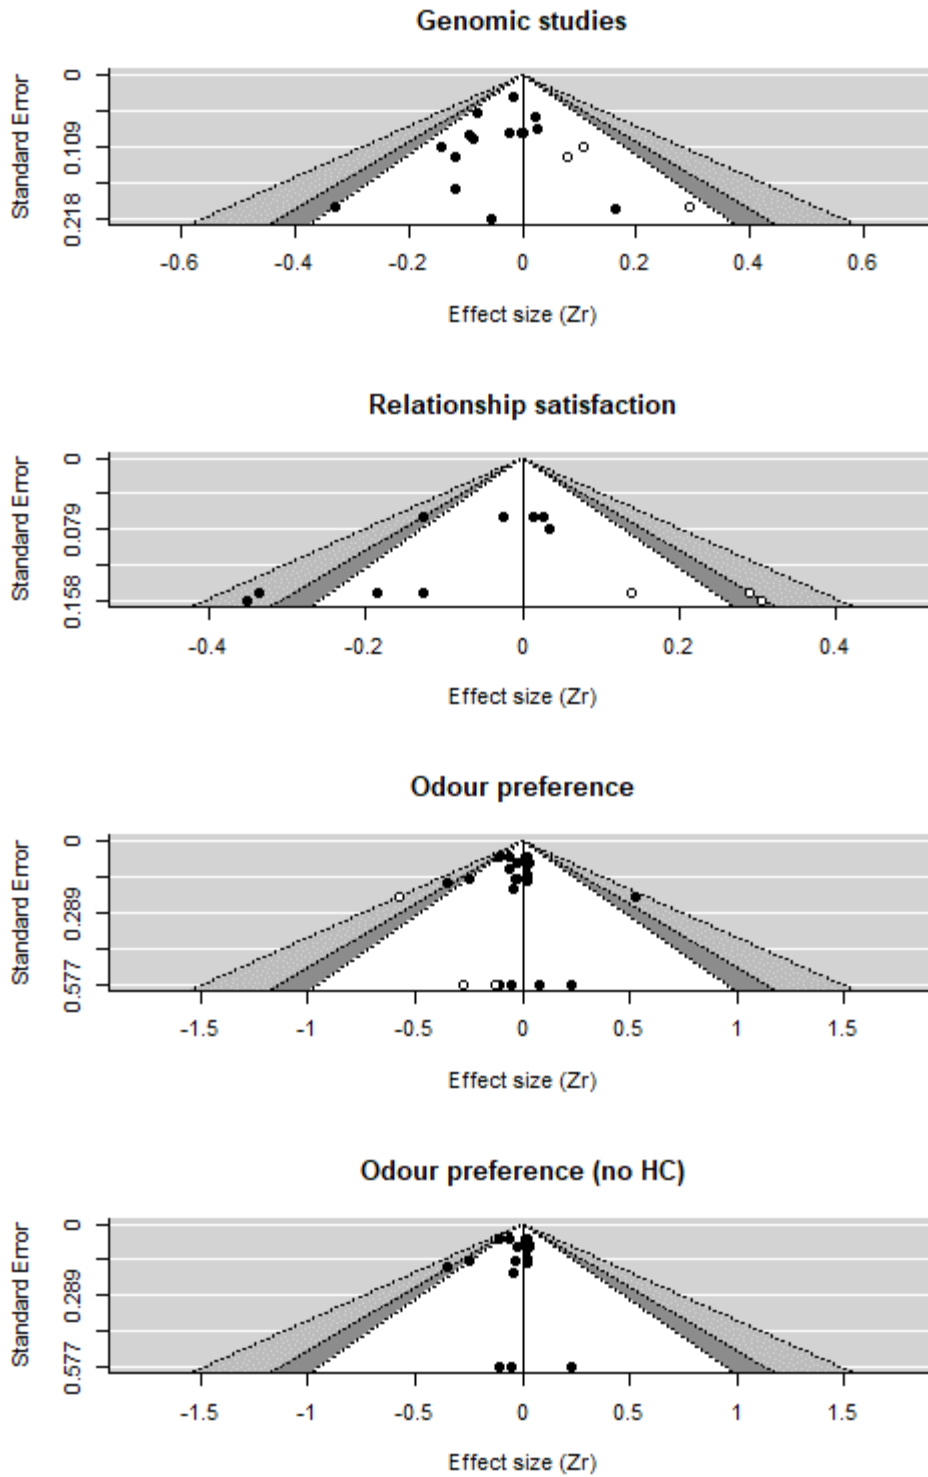



### Mate selection using residuals

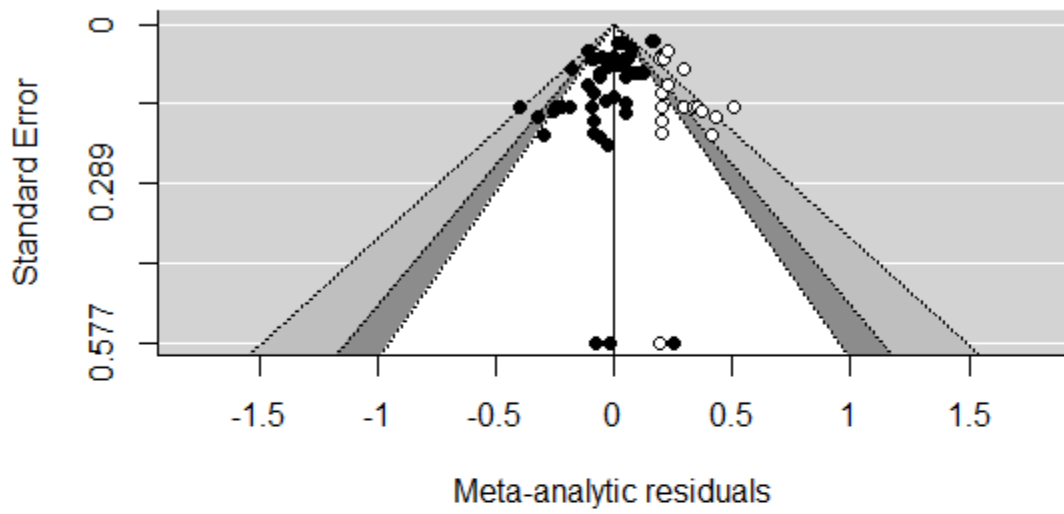

### Mate selection

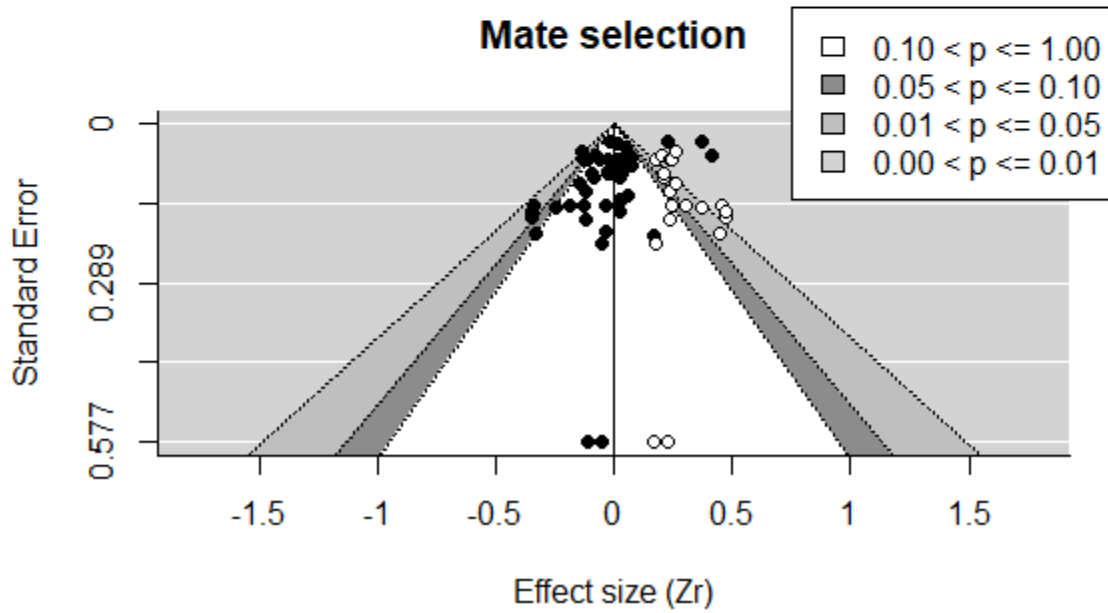

**Figure S3. Meta-regression plot for all mate selection studies indicates evidence of publication bias.**

The significant positive relationship between natural log number of raters and MHC effect size ( $Z_r$ ) suggests that greater power diminishes the effect of MHC dissimilarity on mate selection ( $N=55$ ,  $\beta=0.058$ ,  $p=0.005$ ). The colored line represent model predictions and grey regions represent 95% confidence intervals. Size of points is proportional to their weight (inverse SE).

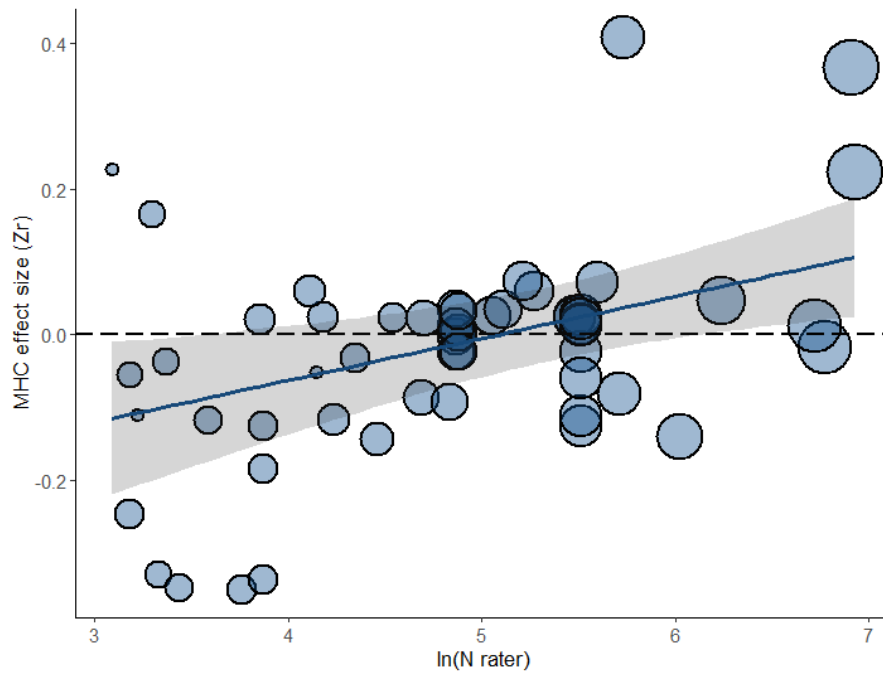

Supplement: rstb20190260supp1.pdf [file rstb20190260supp1.pdf]
